# Supplementary material for: Chemiluminescence Biosensor for the Determination of Cardiac Troponin I (cTnI)
Source: Preprints.org preprint supplement (doi:10.20944/preprints202302.0176.v1), 2023-02-10
Supplement: Supplementary file 1 [file supplementary]

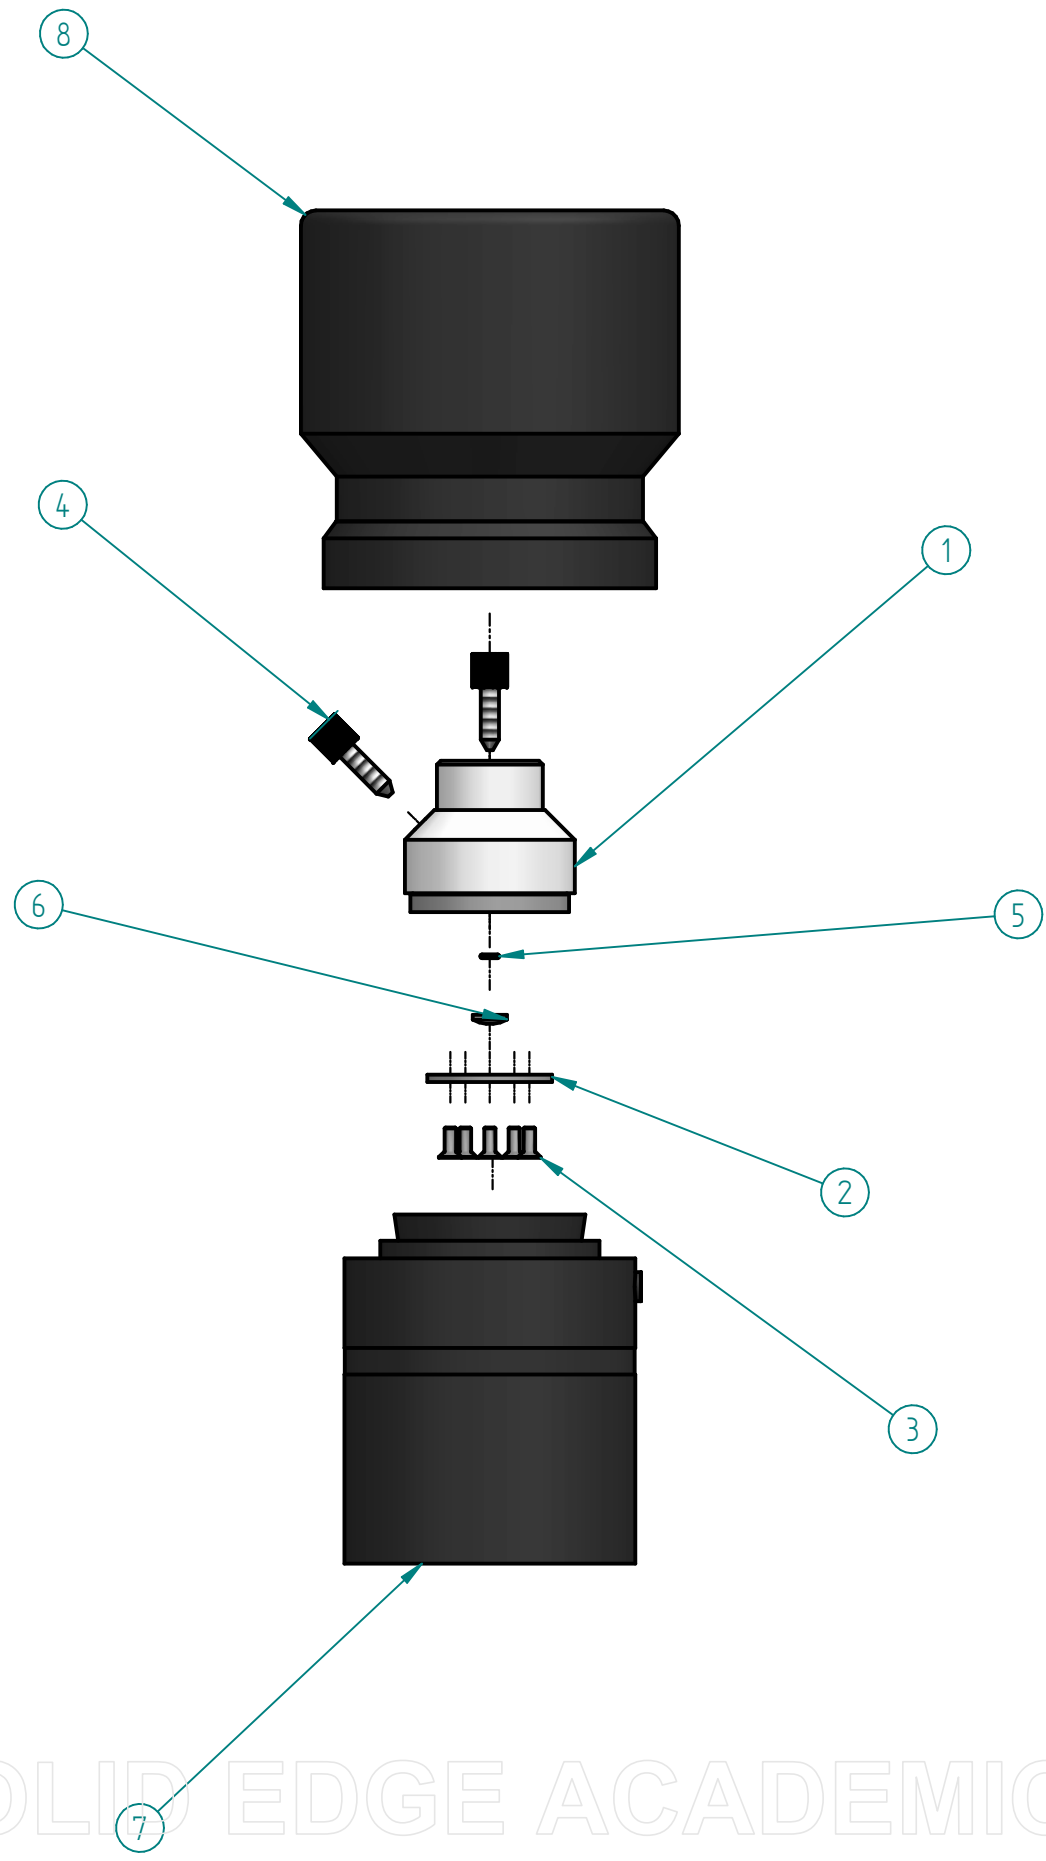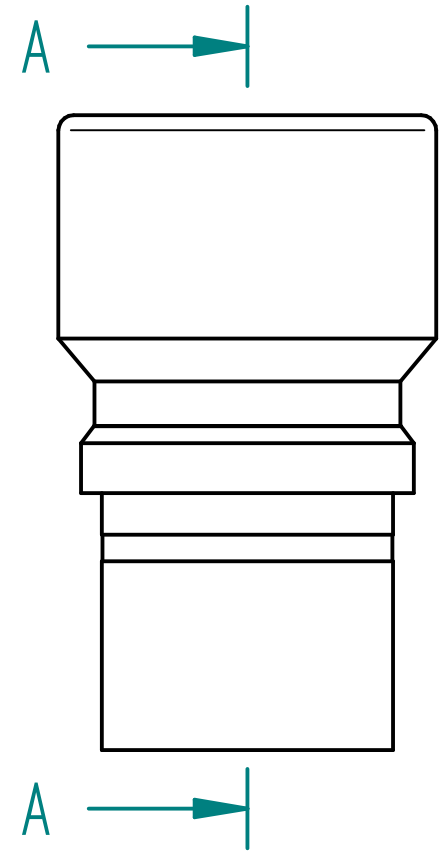

Schnitt A-A

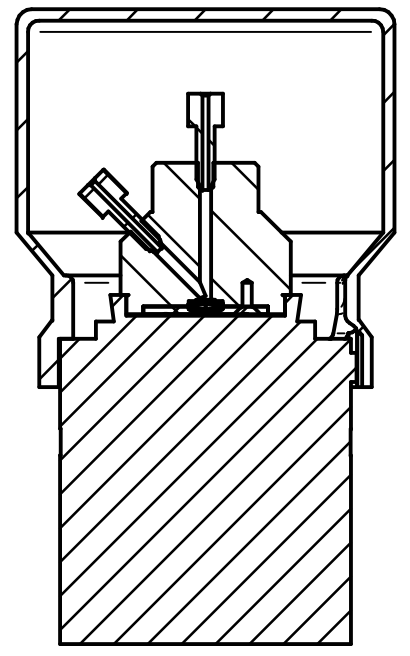

| Pos. | File Name                 | Material        | Amount |
|------|---------------------------|-----------------|--------|
| 1    | Flow Cell                 | POM             | 1      |
| 2    | Cover Plate               | ABS 3D printed  | 1      |
| 3    | DIN 7991 - M3x8           | Stainless Steel | 5      |
| 4    | Fitting_unf 10-32_ferrule | PEEK            | 2      |
| 5    | O-Ring 3x1                | NBR 70°         | 1      |
| 6    | Lense_32008_9mm           |                 | 1      |
| 7    | CMOS Camera               |                 | 1      |
| 8    | Enclosure                 | ABS 3D printed  | 1      |

|                                                                                                                                                                                              |         |            |                                  |  |  |
|----------------------------------------------------------------------------------------------------------------------------------------------------------------------------------------------|---------|------------|----------------------------------|--|--|
|                                                                                                                                                                                              | NAME    | DATE       | Flow cell with CMOS camera       |  |  |
| DRAWN                                                                                                                                                                                        | broeder | 01/03/2023 |                                  |  |  |
| CHECKED                                                                                                                                                                                      |         |            | TITLE Flow cell with CMOS camera |  |  |
| ENG APPR                                                                                                                                                                                     |         |            |                                  |  |  |
| MGR APPR                                                                                                                                                                                     |         |            | SIZE B DWG NO REV                |  |  |
| <div><div><div>BAM</div><div>Bundesanstalt für<br/>Materialforschung<br/>und -prüfung</div></div></div> |         |            |                                  |  |  |
|                                                                                                                                                                                              |         |            | SCALE: WEIGHT:                   |  |  |
